# Supplementary material
Source: Springer Nature journal article supplement (https://springermedizin.de/resource/supplementary/13063_2011_702_MOESM1_ESM.pdf/9618520)

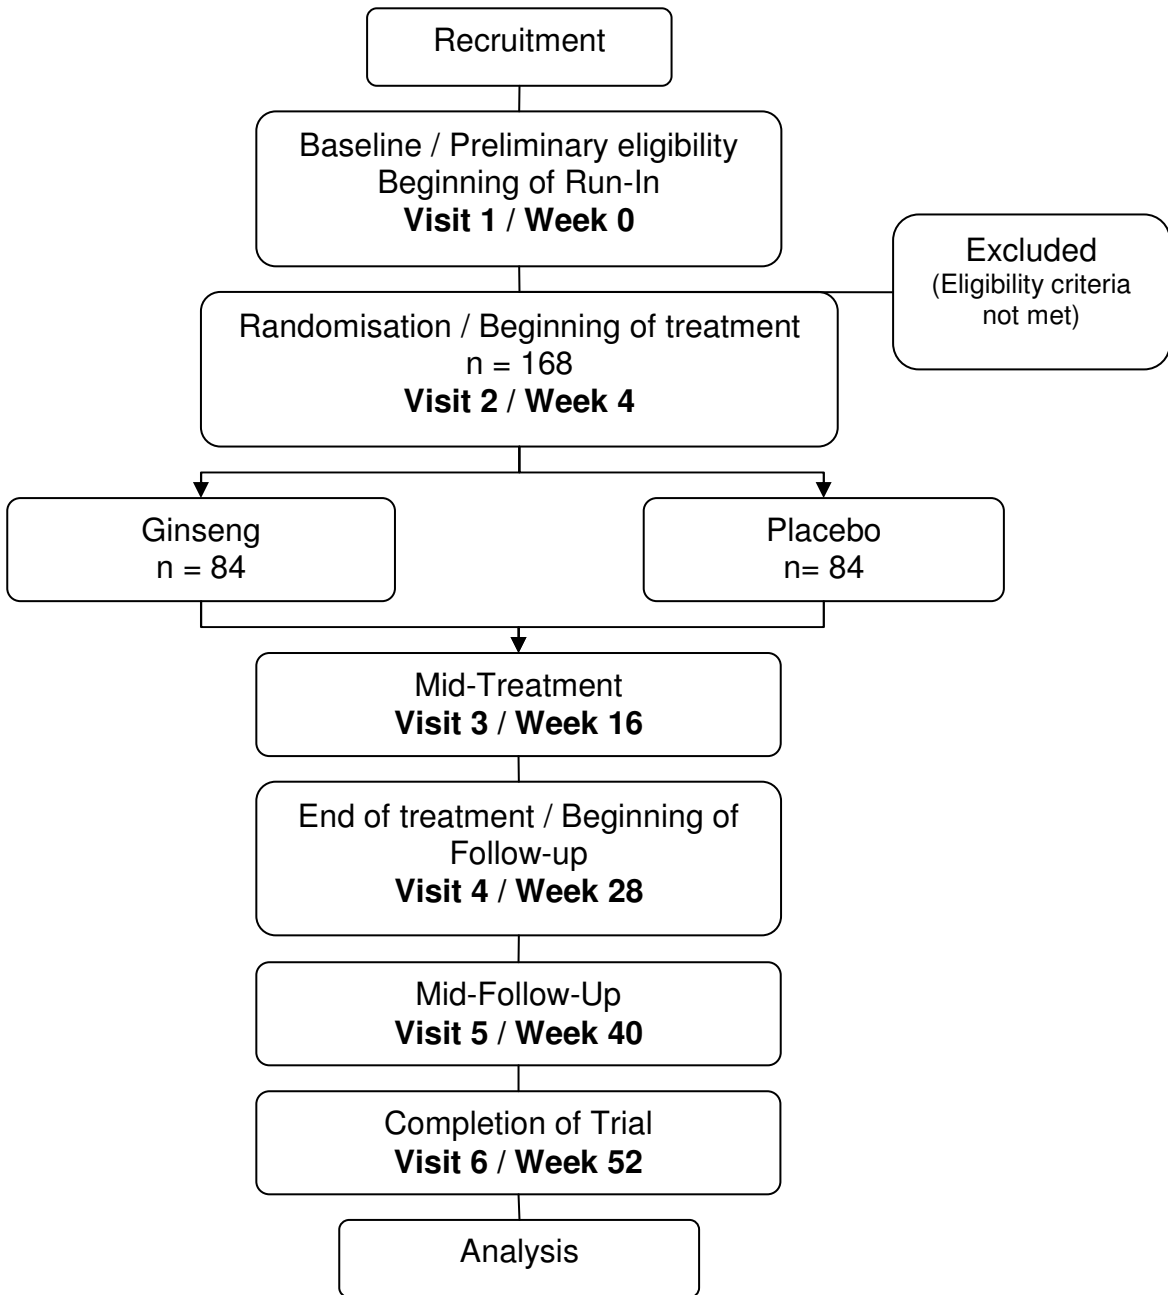

Supplement: MOESM1 [file 9618520]
